# Supplementary material for: The PDGF pathway in breast cancer is linked to tumour aggressiveness, triple-negative subtype and early recurrence
Source: PubMed Central journal article supplement (PMC5945746; doi:10.1007/s10549-018-4664-7), 2018-01-29

## **SUPPLEMENTARY FIGURES AND TABLES**

**Article title:** The PDGF pathway in breast cancer is linked to tumour aggressiveness, triple-negative subtype and early recurrence

**Journal name:** Breast Cancer Research and Treatment

**Authors:** Sara Jansson\*, Kristina Aaltonen, Pär-Ola Bendahl, Anna-Karin Falck, Maria Karlsson, Kristian Pietras and Lisa Rydén

**\*Corresponding author:** Sara Jansson, email: [sara.jansson@med.lu.se](mailto:sara.jansson@med.lu.se), affiliation: Lund University, Division of Oncology and Pathology, Department of Clinical Sciences Lund, Medicon Village, SE-223 81 Lund, Sweden

**Table S1** Correlations between expression of ligand PDGF-CC and PDGF-receptors  $\alpha$  and  $\beta$ 

|                                                              |                     | PDGFR $\alpha$ in tumour cells | PDGFR $\alpha$ in stroma | PDGFR $\beta$ in stroma | PDGF-CC in tumour cells |
|--------------------------------------------------------------|---------------------|--------------------------------|--------------------------|-------------------------|-------------------------|
| PDGFR $\alpha$ in tumour cells                               | Pearson Correlation | 1                              | -.010                    | .077                    | .263**                  |
|                                                              | Sig. (2-tailed)     |                                | .820                     | .094                    | .000                    |
|                                                              | N                   | 501                            | 482                      | 474                     | 473                     |
| PDGFR $\alpha$ in stroma                                     | Pearson Correlation |                                | 1                        | .200**                  | .142**                  |
|                                                              | Sig. (2-tailed)     |                                |                          | .000                    | .002                    |
|                                                              | N                   |                                | 489                      | 468                     | 466                     |
| PDGFR $\beta$ in stroma                                      | Pearson Correlation |                                |                          | 1                       | .116*                   |
|                                                              | Sig. (2-tailed)     |                                |                          |                         | .013                    |
|                                                              | N                   |                                |                          | 480                     | 463                     |
| PDGF-CC in tumour cells                                      | Pearson Correlation |                                |                          |                         | 1                       |
|                                                              | Sig. (2-tailed)     |                                |                          |                         |                         |
|                                                              | N                   |                                |                          |                         | 483                     |
| **. Correlation is significant at the 0.01 level (2-tailed). |                     |                                |                          |                         |                         |
| *. Correlation is significant at the 0.05 level (2-tailed).  |                     |                                |                          |                         |                         |

**Table S2** Odds ratio (OR) of concomitant ligand and receptor expression in relation to tumour and patient characteristics

| Biomarker expression     | All patients N=550 | PDGFR $\alpha$ in tumour cells + PDGF-CC in tumour cells | PDGFR $\alpha$ in stroma + PDGF-CC in tumour cells | PDGFR $\beta$ in stroma + PDGF-CC in tumour cells |
|--------------------------|--------------------|----------------------------------------------------------|----------------------------------------------------|---------------------------------------------------|
|                          | N (%)              | OR (95% CI)                                              | OR (95% CI)                                        | OR (95% CI)                                       |
| <b>Age (median)</b>      |                    |                                                          |                                                    |                                                   |
| <50                      | 110 (20)           | 1.0                                                      | 1.0                                                | 1.0                                               |
| $\geq$ 50                | 440 (80)           | <b>0.35 (0.18-0.69)</b>                                  | <b>0.27 (0.15-0.47)</b>                            | <b>0.22 (0.11-0.43)</b>                           |
| <b>T-size</b>            |                    |                                                          |                                                    |                                                   |
| $\leq$ 20 mm             | 366 (67)           | 1.0                                                      | 1.0                                                | 1.0                                               |
| >20 mm                   | 179 (33)           | NS                                                       | <b>1.96 (1.15-3.35)</b>                            | NS                                                |
| <b>Node status</b>       |                    |                                                          |                                                    |                                                   |
| N0                       | 319 (60)           | 1.0                                                      | 1.0                                                | 1.0                                               |
| N+                       | 215 (40)           | NS                                                       | NS                                                 | NS                                                |
| <b>NHG</b>               |                    |                                                          |                                                    |                                                   |
| I                        | 118 (22)           | 1.0                                                      | 1.0                                                | 1.0                                               |
| II                       | 287 (54)           | NS                                                       | NS                                                 | NS                                                |
| III                      | 129 (24)           | <b>5.3 (1.78-15.97)</b>                                  | <b>6.83 (2.91-16.01)</b>                           | <b>7.82 (2.28-26.86)</b>                          |
| <b>Ki67</b>              |                    |                                                          |                                                    |                                                   |
| Low ( $\leq$ 20)         | 335 (67)           | 1.0                                                      | 1.0                                                | 1.0                                               |
| High (>20)               | 165 (33)           | <b>6.18 (3.0-12.73)</b>                                  | <b>7.66 (4.17-14.07)</b>                           | <b>11.78 (4.78-29.06)</b>                         |
| <b>St Gallen subtype</b> |                    |                                                          |                                                    |                                                   |
| Luminal A                | 193 (41)           | 1.0                                                      | 1.0                                                | 1.0                                               |
| Luminal B HER2-          | 153 (32)           | NS                                                       | <b>4.2 (1.62-10.86)</b>                            | <b>6.50 (1.83-23.07)</b>                          |
| Luminal B HER2+          | 79 (17)            | NS                                                       | <b>6.06 (2.21-16.61)</b>                           | <b>5.95 (1.50-23.65)</b>                          |
| HER2-type                | 15 (3)             | NS                                                       | <b>25.57 (6.56-99.67)</b>                          | <b>10.06 (1.53-66.04)</b>                         |
| TNBC                     | 33 (7)             | <b>9.84 (3.53-27.44)</b>                                 | <b>20.41 (6.96-59.91)</b>                          | <b>16.89 (4.10-69.59)</b>                         |
| <b>ER</b>                |                    |                                                          |                                                    |                                                   |
| Neg                      | 57 (11)            | 1.0                                                      | 1.0                                                | 1.0                                               |

|              |          |                         |                          |                          |
|--------------|----------|-------------------------|--------------------------|--------------------------|
| Pos          | 449 (89) | <b>0.30 (0.14-0.64)</b> | <b>0.11 (0.06-0.21)</b>  | <b>0.25 (0.12-0.54)</b>  |
| <b>PR</b>    |          |                         |                          |                          |
| Neg          | 108 (23) | 1.0                     | 1.0                      | 1.0                      |
| Pos          | 367 (77) | <b>0.29 (0.15-0.56)</b> | <b>0.19 (0.10-0.33)</b>  | <b>0.22 (0.11-0.45)</b>  |
| <b>EGFR</b>  |          |                         |                          |                          |
| Neg          | 419 (83) | 1.0                     | 1.0                      | 1.0                      |
| Pos          | 84 (17)  | <b>4.3 (2.18-8.48)</b>  | <b>7.30 (4.09-13.02)</b> | <b>5.56 (2.73-11.36)</b> |
| <b>CK5/6</b> |          |                         |                          |                          |
| Neg          | 378 (75) | 1.0                     | 1.0                      | 1.0                      |
| Pos          | 124 (25) | <b>4.25 (2.20-8.24)</b> | <b>3.11 (1.79-5.39)</b>  | <b>2.68 (1.33-5.40)</b>  |
| <b>HER2</b>  |          |                         |                          |                          |
| Neg          | 440 (88) | 1.0                     | 1.0                      | 1.0                      |
| Pos          | 62 (12)  | NS                      | <b>2.72 (1.50-4.94)</b>  | NS                       |

NS = not significant.

**Table S3** Cox univariable and multivariable regression analysis to evaluate the survival effect of PDGF-CC expression in terms of 5-year DRFi, adjusted for important clinicopathological factors

|                          | Univariable       |          | Multivariable     |          |
|--------------------------|-------------------|----------|-------------------|----------|
|                          | HR                | <i>P</i> | HR                | <i>P</i> |
| <b>Age (per year)</b>    |                   |          |                   |          |
| <50 years                | 1.00              |          | 1.00              |          |
| ≥50 years                | 0.79 (0.45-1.38)  | 0.40     | 0.95 (0.50-1.78)  | 0.86     |
| <b>Tumour size</b>       |                   |          |                   |          |
| <20 mm                   | 1.00              |          | 1.00              |          |
| ≥20 mm                   | 3.96 (2.40-6.53)  | <0.001   | 2.52 (1.40-4.54)  | 0.002    |
| <b>Node</b>              |                   |          |                   |          |
| N0                       | 1.00              |          | 1.00              |          |
| N+                       | 4.28 (2.48-7.37)  | <0.001   | 3.15 (1.70-5.84)  | <0.001   |
| <b>NHG</b>               |                   |          |                   |          |
| I                        | 1.00              |          | 1.00              |          |
| II                       | 3.40 (1.20-9.62)  | 0.02     | 3.80 (0.89-16.28) | 0.07     |
| III                      | 7.72 (2.64-21.39) | <0.001   | 5.14 (1.15-22.96) | 0.03     |
| <b>St Gallen subtype</b> |                   |          |                   |          |
| Luminal A                | 1.00              |          | 1.00              |          |
| Luminal B HER2-          | 3.23 (1.54-6.75)  | 0.002    | 2.15 (0.97-4.77)  | 0.06     |
| Luminal B HER2+          | 4.49 (2.06-9.81)  | <0.001   | 2.52 (1.07-5.93)  | 0.03     |
| HER2-Type                | 2.61 (0.57-11.93) | 0.22     | 0.58 (0.07-4.87)  | 0.61     |
| TNBC                     | 5.57 (2.20-14.11) | <0.001   | 2.57 (0.83-7.98)  | 0.10     |
| <b>PDGF-CC</b>           |                   |          |                   |          |
| Negative                 | 1.00              |          | 1.00              |          |
| Positive                 | 1.77 (1.03-3.04)  | 0.04     | 1.14 (0.59-2.19)  | 0.70     |

**Fig. S1a-c** Relation between expression levels of the PDGF-receptors and of ligand PDGF-CC.

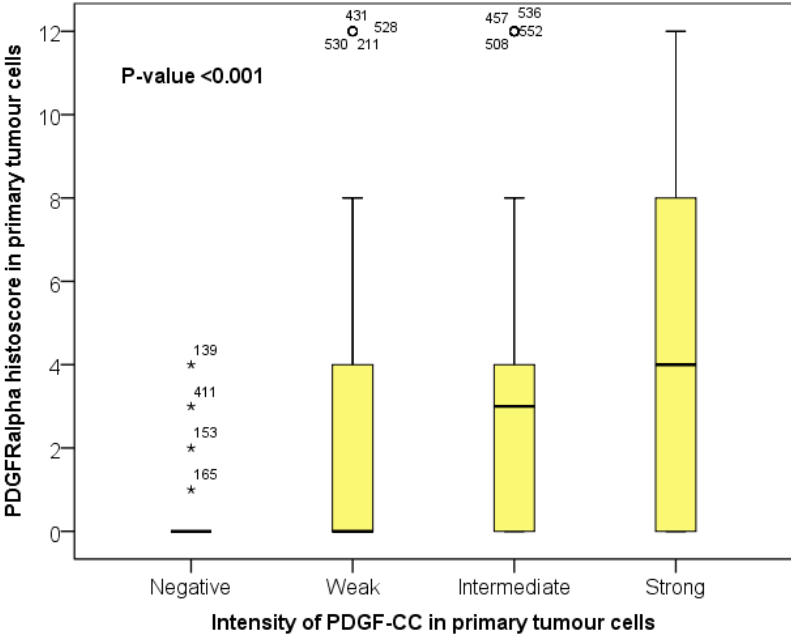

**Fig. S1a** PDGFRα in tumour cells vs PDGF-CC. *P*-value from Jonckheere Terpstra test

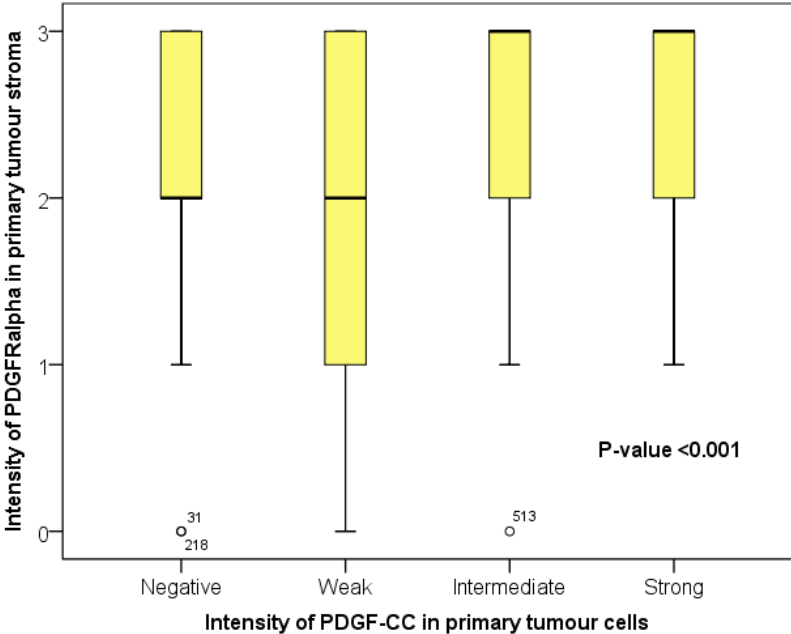

**Fig. S1b** PDGFRα in tumour stroma vs PDGF-CC. *P*-value from Jonckheere Terpstra test

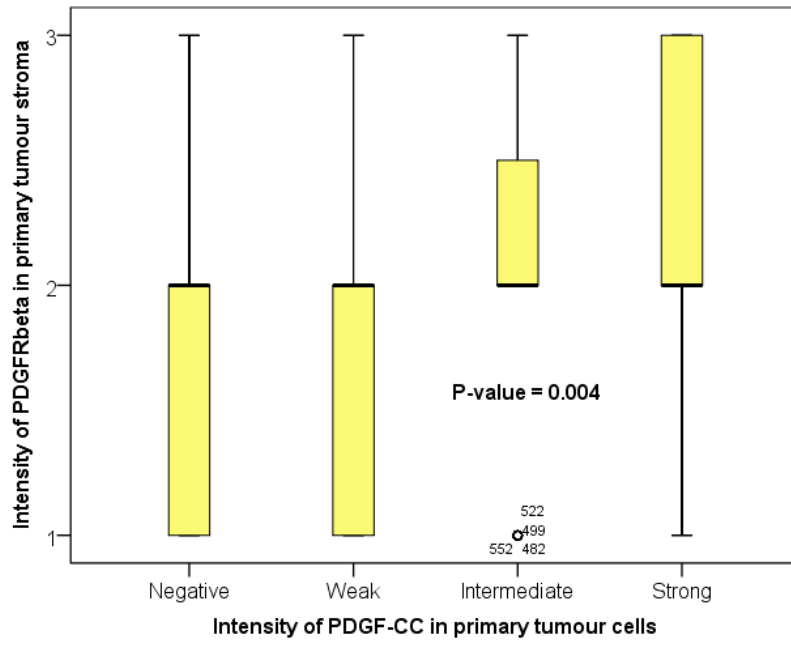

**Fig. S1c** PDGFR $\beta$  in tumour stroma vs PDGF-CC. *P*-value from Jonckheere Terpstra test

**Fig. S2a-c** Kaplan-Meier survival curves showing DRFi (years) in relation to biomarker expression. P-values from log rank test

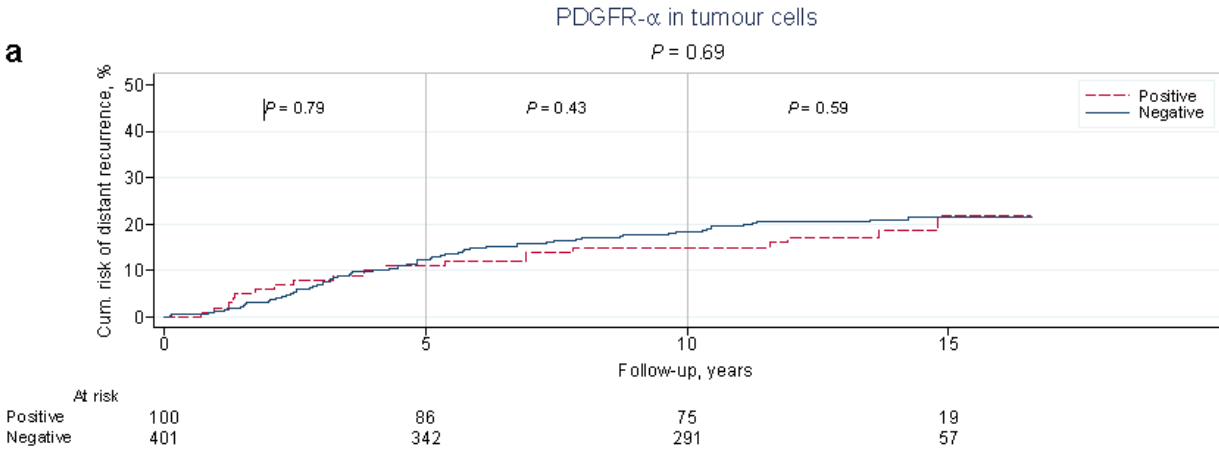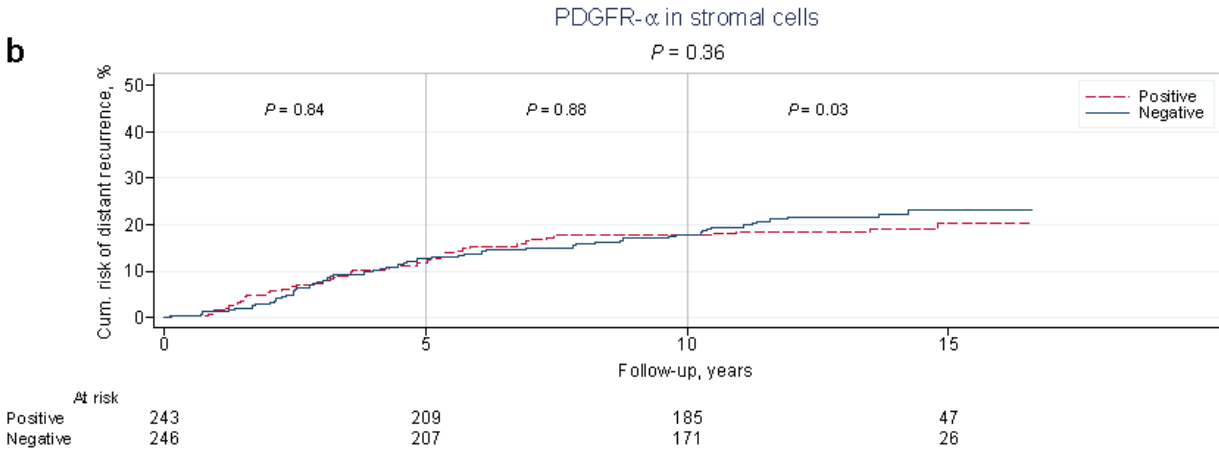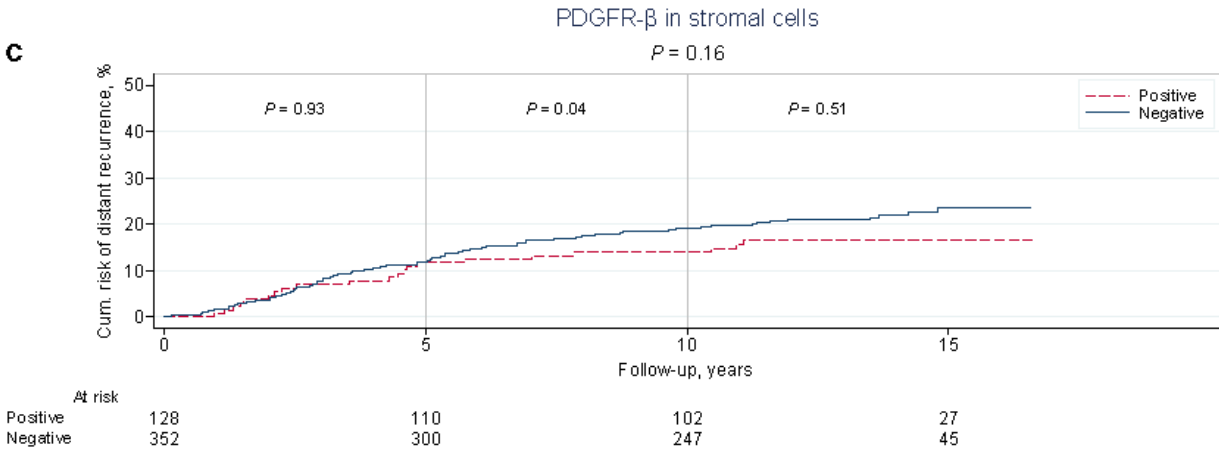

Supplement: 10549_2018_4664_MOESM1_ESM.pdf [file 10549_2018_4664_MOESM1_ESM.pdf]
